# Supplementary material for: A case study of the radiative effect of aerosols over Europe: EUCAARI-LONGREX
Source: Copernicus journal article supplement (doi:10.5194/acp-2015-953), 2016-02-15
Supplement: Supplementary file 1 [file acp-2015-953-supplement.pdf]

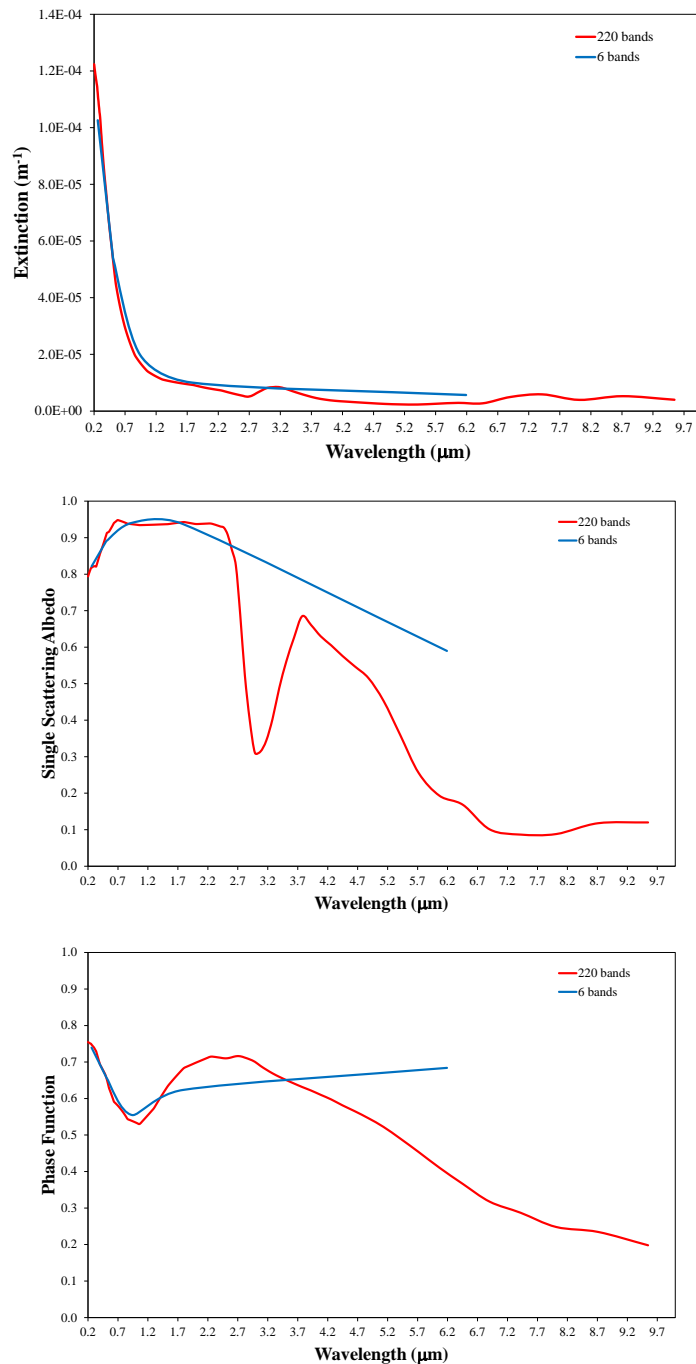

5

**Fig. S1.** Spectral dependence of the aerosol extinction (top), the single scattering albedo (middle) and the phase function (bottom) over the range 0.2 - 10 μm.
